# Supplementary material for: Intraspecific Variation of Samara Dispersal Traits in the Endangered Tropical Tree Hopea hainanensis (Dipterocarpaceae)
Source: PubMed Central journal article supplement (PMC7691252; doi:10.3389/fpls.2020.599764), 2020-11-13

## Supplementary Material

# Intraspecific variation of samara dispersal traits in the endangered tropical tree *Hopea hainanensis* (Dipterocarpaceae)

Yao-Bin Song<sup>1</sup>, Xiao-Lu Shen-Tu<sup>1</sup>, Ming Dong<sup>1\*</sup>

\*Correspondence:

Ming Dong: [dongming@hznu.edu.cn](mailto:dongming@hznu.edu.cn)

**FIGURE 1** The relationship between samara traits (A, fruit mass; B, seed mass; C, wing mass; D, wing mass ratio; E, seed length; F, seed width; G, seed morphological index; H, wing area; I, wing aspect ratio; J, wing loading) and samara settling velocity of *Hopea hainanensis*. Each point represents the mean trait value of one parent tree with bars representing one standard error around the mean (n = 17 parent trees). Regression lines with 95% interval (shaded area) were plotted for significant relationships with  $P < 0.05$ .

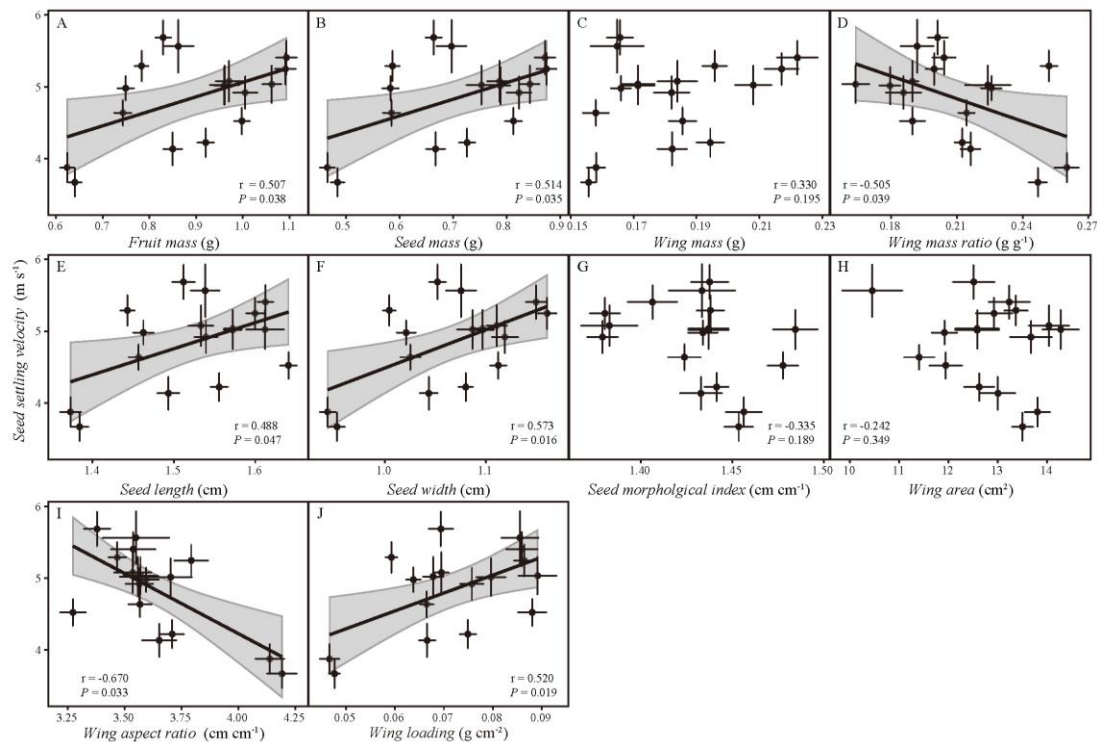

Supplement: Image_1.pdf [file Image_1.pdf]
